# Supplementary material for: Internal amino acid state modulates yeast taste neurons to support protein homeostasis in Drosophila
Source: eLife journal article supplement (doi:10.7554/elife.31625), 2018-02-01
Supplement: supp [file elife-31625-supp-v1.zip]

| line             | genotype                                        | source          | yeast<br>preference<br>phenotype | note                                                     |
|------------------|-------------------------------------------------|-----------------|----------------------------------|----------------------------------------------------------|
| Ir25a-GAL4       | <i>w; IR25a-Gal4 #236.1/(CyO);</i>              | BDSC            | Yes                              |                                                          |
| Ir76b-GAL4       | <i>w; IR76B-Gal4 #226.8/CyO;</i>                | BDSC            | Yes                              |                                                          |
| 1B-GAL4          | <i>d5-HT 1B-Gal4</i>                            | Amita Sehgal    | No                               |                                                          |
| ato-GAL4         | <i>y[1] w[*]; P{w[+mC]=ato-GAL4.3.6}10;</i>     | BDSC            | No                               |                                                          |
| ato-GAL4         | <i>y[1] w[*]; P{w[+mC]=ato-GAL4.3.6}14a;</i>    | BDSC            | No                               |                                                          |
| c316-GAL4        | <i>w[*]; P{w[+mW.hs]=GawB}c316</i>              | BDSC            | Yes                              | also expresses in taste pegs and other gustatory neurons |
| DCGLUT-GAL4      | <i>DCGLUT-Gal4</i>                              | Aaron DiAntonio | Yes                              | severe secondary behavioral impairments                  |
| Ddc-GAL4         | <i>w[1118]; P{w[+mC]=Ddc-GAL4.L}Lmpt[4.36];</i> | BDSC            | No                               |                                                          |
| E409-GAL4        | <i>w[*]; P{w[+mW.hs]=GawB}E409;</i>             | BDSC            | No                               |                                                          |
| ehups-GAL4       | <i>w*; P{w+ Ehups-Gal4}C21;</i>                 | Elizabeth Gavis | No                               |                                                          |
| G0338-GAL4       | <i>P{w[+mGT]=GT1}CG4004 [BG01793] w[1118];;</i> | BDSC            | No                               |                                                          |
| G0431-GAL4       |                                                 | Ann-Shyn Chiang | No                               |                                                          |
| Gr2a-GAL4        | <i>w[*]; P{w[+mC]=Gr2a-GAL4.2.2}3;</i>          | BDSC            | No                               |                                                          |
| Gr22c-GAL4       | <i>w*; P{Gr22c-GAL4.D}2/CyO;</i>                | BDSC            | No                               |                                                          |
| Gr23a-GAL4 (III) | <i>w*;; P{Gr23a-GAL4.3.5}1</i>                  | BDSC            | No                               |                                                          |
| Gr23a-GAL4 (II)  | <i>w*; P{Gr23a-GAL4.3.5}5/CyO;</i>              | BDSC            | No                               |                                                          |
| Gr28a-GAL4       | <i>P{w[+mC]=Gr28a-GAL4.T}E1/TM3, Sb[1]</i>      | BDSC            | No                               |                                                          |
| Gr39a.b-GAL4     | <i>;;P{w[+mC]=Gr39a.b-GAL4.1}1D</i>             | BDSC            | No                               |                                                          |
| Gr57a-GAL4       | <i>w[*]; P{w[+mC]=Gr57a-GAL4.6}1D/CyO</i>       | BDSC            | No                               |                                                          |
| Gr5a-GAL4        | <i>;Gr5a-Gal4; Gr5a-Gal4</i>                    | Kristin Scott   | No                               |                                                          |
| Gr64e-GAL4       | <i>w[*]; P{w[+mC]=Gr64e-GAL4.8}5;</i>           | BDSC            | No                               |                                                          |

|                     |                                                                |                     |    |  |
|---------------------|----------------------------------------------------------------|---------------------|----|--|
| Gr77a-GAL4<br>(III) | <i>w*;; P{Gr77a-GAL4.4}1L</i>                                  | BDSC                | No |  |
| Gr77a-GAL4<br>(II)  | <i>w*;; P{Gr77a-GAL4.4}10;</i>                                 | BDSC                | No |  |
| Gr89a-GAL4          | <i>w*;; P{Gr89a-GAL4.2}11/CyO</i>                              | BDSC                | No |  |
| Gr92a-GAL4<br>(II)  | <i>w*;; P{Gr92a-GAL4.3.9}6;</i>                                | BDSC                | No |  |
| Gr92a-GAL4<br>(III) | <i>w*;; P{Gr92a-GAL4.3.9}1/TM3, Sb1</i>                        | BDSC                | No |  |
| Gr94a-GAL4          | <i>w[*]; P{w[+mC]=Gr94a-GAL4.3.7}10;</i>                       | BDSC                | No |  |
| Gr98c-GAL4          | <i>w*;; P{Gr98c-GAL4.4}3/CyO;</i>                              | BDSC                | No |  |
| Gr94a-GAL4          | <i>w*;; P{Gr94a-GAL4.3.7}6</i>                                 | BDSC                | No |  |
| Gr9a-GAL4<br>(II)   | <i>w*;; P{Gr9a-GAL4.6.3}7;</i>                                 | BDSC                | No |  |
| Gr9a-GAL4<br>(III)  | <i>w*;; P{Gr9a-GAL4.6.3}1</i>                                  | BDSC                | No |  |
| HugS3-GAL4          | <i>w[*]; P{w[+mC]=Hug-GAL4.S3}3</i>                            | Michael Pankratz    | No |  |
| Ilp7-GAL4           | <i>W* (I);; ILp7-Gal4/(TM6SbDfdYFP)</i>                        | Irene Miguel-Aliaga | No |  |
| Ir20a-GAL4          | <i>w[*];; P{w[+mC]=Ir20a-GAL4.K}2/TM6B, Tb[1]</i>              | BDSC                | No |  |
| Ir40a-GAL4          | <i>w; IR40a-Gal4 #214.1/(CyO);</i>                             | Richard Benton      | No |  |
| Ir41a-GAL4          | <i>w; IR41a-Gal4 BT42.1/CyO;</i>                               | Richard Benton      | No |  |
| Ir52d-GAL4          | <i>w[*];; P{y[+t7.7] w[+mC]=Ir52d-GAL4.K}attP2/TM6B, Tb[1]</i> | BDSC                | No |  |
| Ir56a-GAL4          | <i>w[*];; P{w[+mC]=Ir56a-GAL4.K}3</i>                          | BDSC                | No |  |
| Ir56b-GAL4          | <i>w[*]; P{y[+t7.7] w[+mC]=Ir56b-GAL4.K}attP40/CyO;</i>        | BDSC                | No |  |
| Ir56d-GAL4<br>(III) | <i>; IR56d-Gal4 BT76.1 #3/TM6b</i>                             | Richard Benton      | No |  |
| Ir56d-GAL4<br>(II)  | <i>w*;; P{Ir56d-GAL4.K}7-2/CyO;</i>                            | BDSC                | No |  |
| Ir60b-GAL4          | <i>w[*]; P{y[+t7.7] w[+mC]=Ir60b-GAL4.K}attP40/CyO;</i>        | BDSC                | No |  |

|                    |                                                                                                                                       |                   |    |  |
|--------------------|---------------------------------------------------------------------------------------------------------------------------------------|-------------------|----|--|
| Ir67c-GAL4         | <i>w</i> [*]; <i>P</i> { <i>y</i> [+ <i>t</i> 7.7]<br><i>w</i> [+ <i>mC</i> ]= <i>Ir67c</i> -<br><i>GAL4.Kb</i> } <i>attP40/CyO</i> ; | BDSC              | No |  |
| Ir75a-GAL4         | <i>w</i> [*]; <i>P</i> { <i>w</i> [+ <i>mC</i> ]= <i>Ir75a</i> -<br><i>GAL4.S</i> } <i>BT12.1/TM6B</i> ,<br><i>Tb</i> [1]             | BDSC              | No |  |
| Ir75a-GAL4         | <i>w</i> ; <i>IR75a</i> (5'+3')- <i>Gal4</i><br><i>BT12.1</i>                                                                         | Richard<br>Benton | No |  |
| Ir76a-GAL4         | <i>w</i> ; <i>IR76a-Gal4</i><br>#292.3B/ <i>CyO</i> ;                                                                                 | Richard<br>Benton | No |  |
| Ir8a-GAL4          | <i>w</i> ; <i>IR8a-Gal4</i> #204.8/ <i>CyO</i> ;                                                                                      | Richard<br>Benton | No |  |
| Ir92a-GAL4         | <i>w</i> ; <i>IR92a-Gal4</i><br>#288.3/ <i>TM2</i>                                                                                    | Richard<br>Benton | No |  |
| Ir94a-GAL4         | <i>w</i> [*]; <i>P</i> { <i>w</i> [+ <i>mC</i> ]= <i>Ir94a</i> -<br><i>GAL4.K</i> }4                                                  | BDSC              | No |  |
| Ir94c-GAL4         | <i>w</i> [*]; <i>P</i> { <i>y</i> [+ <i>t</i> 7.7]<br><i>w</i> [+ <i>mC</i> ]= <i>Ir94c</i> -<br><i>GAL4.Kb</i> } <i>attP40/CyO</i> ; | BDSC              | No |  |
| Ir94f-GAL4         | <i>w</i> [*]; <i>P</i> { <i>y</i> [+ <i>t</i> 7.7]<br><i>w</i> [+ <i>mC</i> ]= <i>Ir94f</i> -<br><i>GAL4.K</i> } <i>attP40/CyO</i> ;  | BDSC              | No |  |
| Ir94h-GAL4         | <i>w</i> [*]; <i>P</i> { <i>y</i> [+ <i>t</i> 7.7]<br><i>w</i> [+ <i>mC</i> ]= <i>Ir94h</i> -<br><i>GAL4.K</i> } <i>attP40/CyO</i> ;  | BDSC              | No |  |
| LEUC-GAL4          | ; <i>LEUC-GAL4/CyO</i> ;                                                                                                              | Bader Al-<br>Anzi | No |  |
| npf-GAL4           | ; <i>npf-Gal4</i> ;                                                                                                                   | Ping Shen         | No |  |
| Poxn-GAL4<br>(II)  | ; <i>Poxn-Gal4 T2d</i> ;                                                                                                              | Ribeiro<br>lab    | No |  |
| Poxn-GAL4<br>(III) | ; <i>Poxn-Gal4 T2a/TM3,Sb</i>                                                                                                         | Ribeiro<br>lab    | No |  |
| Tdc2-GAL4          | <i>w</i> [*]; <i>P</i> { <i>w</i> [+ <i>mC</i> ]= <i>Tdc2</i> -<br><i>GAL4.C</i> }2;                                                  | BDSC              | No |  |
| TH-GAL4            | <i>w</i> *( <i>I</i> ); <i>P</i> { <i>ple-GAL4.F</i> }3                                                                               | BDSC              | No |  |
| VT30559-<br>GAL4   | <i>P</i> { <i>VT30559-GAL4</i> } <i>attP2</i>                                                                                         | VDRC              | No |  |
| VT61723-<br>GAL4   | <i>P</i> { <i>VT61723-GAL4</i> } <i>attP2</i>                                                                                         | VDRC              | No |  |

Supplementary Table 1: GAL4 lines screened for yeast preference phenotypes using thermogenetic silencing.

| Line                                       | LSO (cluster 1) | LSO (cluster 2) | DCSO | VCSO |
|--------------------------------------------|-----------------|-----------------|------|------|
| <i>1261-GAL4;UAS-CD8::GFP</i>              | 2               | 0               | 2    | 3    |
| <i>1261-GAL4;Poxn-GAL80;UAS-CD8::GFP</i>   | 0               | 0               | 0    | 0    |
| <i>Ir25a-GAL4;UAS-CD8::GFP</i>             | 6               | 2               | 6    | 3    |
| <i>Ir25a-GAL4; Poxn-GAL80;UAS-CD8::GFP</i> | 0               | 0               | 0    | 0    |
| <i>Ir76b-GAL4;UAS-CD8::GFP</i>             | 6               | 2               | 6    | 3    |
| <i>Ir76b-GAL4; Poxn-GAL80;UAS-CD8::GFP</i> | 3               | 0               | 0    | 0    |

Supplementary Table 2: Number of cell bodies counted on either side of the internal sense organs in the depicted lines.

| figure                                  | line                               | full genotype                                       | source                   |
|-----------------------------------------|------------------------------------|-----------------------------------------------------|--------------------------|
| 1,2,3,4,5,6,1S1,1S2,1S3,3S3,4S1,5S1,6S1 | ;lr76b-GAL4;                       | w; IR76B-Gal4 #226.8/CyO;                           | Richard Benton           |
| 1,2,S1,1S2,1S3,2S1                      | ;lr25a-GAL4;                       | w; IR25a-Gal4 #236.1/(CyO);                         | Richard Benton           |
| 1,2,3,S1,1S2,1S3,2S1,3S3                | ;1261-GAL4;                        | w*;1261-GAL4;(CyO)                                  | Ulrike Heberlein         |
| 1,2,1S2,2S1,2S2                         | ;UAS-CD8::GFP;                     | ;UAS-CD8::GFP/(CyO);                                | Barry Dickson            |
| 1,2,1S2,2S1                             | ;UAS-shi[ts] (attP5);              | pJFRC100-20xUAS-TTS-Shibire-ts1-p10 in su(Hw) attP5 | Gerry Rubin              |
| 1,2,1S2,2S1                             | ;attP5; control                    | y[1] w[*]; P{y[+t7.7]=CaryIP}su(Hw)attP5            | BDSC                     |
| 1,3,4,5,1S1,1S3,4S1,5S1                 | ;UAS-GCaMP6s;                      | w[1118]; P{y[+t7.7]w[+mC]=20XUAS-IVS-GCaMP6s}attP40 | BDSC                     |
| 1,1S3                                   | ;lr76b-GAL80 (attP2)               |                                                     | Ribeiro lab, see methods |
| 2                                       | ;tshirt-GAL80;                     |                                                     | Gero Miesenboeck         |
| 2,3                                     | ;Poxn[ΔM22-B5];                    |                                                     | Werner Boll              |
| 2,3                                     | ;Poxn[ΔM22-B5];ΔSfoBs105/ΔSfoBs127 |                                                     | Werner Boll              |
| 2                                       | ;VT033654-GAL4 (attP2)             |                                                     | VDRC                     |
| 2                                       | ;Gr9a-GAL4;                        | w*; P{Gr9a-GAL4.6.3}7;                              | BDSC                     |
| 2                                       | ;lr67c-GAL4;                       | w[*]; P{y[+t7.7]w[+mC]=lr67c-GAL4.Kb}attP40/CyO;    | BDSC                     |
| 2,3,1S1,1S2,1S3,2S1,2S2,3S3             | ;UAS-shi[ts] (VK00005)             | pJFRC100-20xUAS-TTS-Shibire-ts1-p10 in VK00005      | Janelia Research Campus  |
| 2,3,1S1,1S2,1S3,2S1,2S2,3S3             | ;VK00005 control                   | y[1] w[1118];; PBac{y[+]-attP-9A}VK00005            | BDSC                     |
| 2,2S1                                   | ;Poxn-GAL80 (attP2)                |                                                     | Ribeiro lab, see methods |
| 2,3,2S2,3S3                             | ;67E03-GAL4                        | w1118;; P{GMR67E03-GAL4}attP2                       | BDSC                     |
| 2,3,2S2,3S3                             | ;pBDP-GAL4U (attP2)                |                                                     | BDSC                     |
| 3, 2S2,3S3                              | ;57F03-Gal4                        | w1118;; P{GMR57F03-GAL4}attP2                       | BDSC                     |
| 3,3S3                                   | attP2                              | y[1] w[67c23];;P{CaryP}attP2                        | BDSC                     |
| 3,3S3                                   | ; ;UAS-GtACR1                      | w[1118];; 20xUAS-GtACR1 (attP2)                     | Adam Claridge-Chang      |

|               |                |                                                |                             |
|---------------|----------------|------------------------------------------------|-----------------------------|
| 3,2S2         | ::;Poxn-GAL4   | w*;P{Poxn-Gal4.14}1-7/TM6B,<br>Tb <sup>1</sup> | Markus Noll                 |
| 3             | ;UAS-Kir2.1;   | w*;P{UAS-<br>HsapKCNJ2.EGFP}1;                 | BDSC                        |
| 4,2S2,3S3,5S1 | ;Gr5a-GAL4;    |                                                | Kristin Scott               |
| 1S1,3S3       | E409-GAL4      | w[*];<br>P{w[+mW.hs]=GawB}E409;                | BDSC                        |
| 1S1           | Gr64e-GAL4     | w[*]; P{w[+mC]=Gr64e-<br>GAL4.8}5;             | BDSC                        |
| 1S2,3S3       | w[1118];;      |                                                | Barry<br>Dickson            |
| 1S3           | Ir76b[1]       |                                                | Craig Montell               |
| 1S3           | Ir76b[rev]     |                                                | Craig Montell               |
| 1S3           | Ir76b[MB00216] | y[1]w[67c23];;Mi{ET1}Ir76b[M<br>B00216]        | BDSC                        |
| 1S3           | Ir76b[05]      | y[1]w[*];;P{UAST-<br>YFP.Rab39.S23N}Ir76b[05]  | BDSC                        |
| 1S3           | Ir25a[1]       |                                                | Richard<br>Benton           |
| 1S3           | IR25a[2]       |                                                | Richard<br>Benton           |
| 2S1           | Ir8a[-/-]      | Ir8a[1];;                                      | Richard<br>Benton           |
| 2S1           | Ir8a[+/+]      | IR8a[1], IR8a-rescue #<br>BT128.1;;            | Richard<br>Benton           |
| 2S1           | Orco[1]        |                                                | Sofia<br>Lavista-<br>Llanos |
| 2S1           | Orco[2]        |                                                | Sofia<br>Lavista-<br>Llanos |
| 2S1           | ::;Orco-GAL4   | w[1118]; P{w[+mC]=Orco-<br>GAL4.K}97.1         | BDSC                        |
| 2S1           | ;Ir8a-GAL4;    | w; IR8a-Gal4 #204.8/CyO;                       | Richard<br>Benton           |
| 2S1           | atonal[-/-]    | eyflp; FRT82B ato[1]/FRT82B,<br>CL             | Ilona Kadow                 |
| 2S1           | atonal[+/+]    | eyflp; FRT82B/FRT82B, CL                       | Ilona Kadow                 |
| 2S3           | ;Ir60b-GAL4;   | w; IR60b-Gal4[B-P40-1]/CyO;                    | BDSC                        |
| 2S3           | ::;Ir94f-GAL4  | P{y[+t7.7] w[+mC]=Ir94f-<br>GAL4.K}attP2       | BDSC                        |
| 2S3           | ;Ir94a-GAL4;   | w[*]; P{w[+mC]=Ir94a-<br>GAL4.K}5/CyO;         | BDSC                        |
| 2S3           | ;Gr2a-GAL4;    | w[*]; P{w[+mC]=Gr2a-<br>GAL4.2.2}3;            | BDSC                        |

|     |                |                                                 |               |
|-----|----------------|-------------------------------------------------|---------------|
| 2S3 | ;Gr23a-GAL4;   | w <sup>*</sup> ; P{Gr23a-GAL4.3.5}5/CyO;        | BDSC          |
| 2S3 | ;Gr77a-GAL4;   | w <sup>*</sup> ; P{Gr77a-GAL4.4}10;             | BDSC          |
| 2S3 | ;Gr92a-GAL4;   | w <sup>*</sup> ; P{Gr92a-GAL4.3.9}6;            | BDSC          |
| 2S3 | ;Gr22c-GAL4;   | w <sup>*</sup> ; P{Gr22c-GAL4.D}2/CyO;          | BDSC          |
| 2S3 | ;;Gr39a.b-GAL4 | P{w[+mC]=Gr39a.b-GAL4.1}1D                      | BDSC          |
| 2S3 | ;Gr98c-GAL4;   | w <sup>*</sup> ; P{Gr98c-GAL4.4}3/CyO;          | BDSC          |
| 2S3 | ;;Gr28a-GAL4   | P{w[+mC]=Gr28a-GAL4.T}E1/TM3, Sb[1]             | BDSC          |
| 2S3 | ;Gr57a-GAL4;   | w[ <sup>*</sup> ]; P{w[+mC]=Gr57a-GAL4.6}1D/CyO | BDSC          |
| 2S3 | ;Gr89a-GAL4;   | w <sup>*</sup> ; P{Gr89a-GAL4.2}11/CyO          | BDSC          |
| 3S3 | 83F01-Gal4     | w[1118];; P{GMR83F01-GAL4}attP2                 | BDSC          |
| 6S1 | UAS-SPR-IR1    |                                                 | Barry Dickson |
| 6S1 | ;UAS-SPR-IR2;  |                                                 | Barry Dickson |
| 6S1 | UAS-Dcr2;;     | w[1118], P{w[+mC]=UAS-Dcr-2};;                  | Barry Dickson |

Supplementary Table 3: Genetic lines used in the manuscript.
