# Supplementary figures and images for: Internal amino acid state modulates yeast taste neurons to support protein homeostasis in Drosophila
Source: eLife journal article supplement (doi:10.7554/elife.31625), 2018-02-01

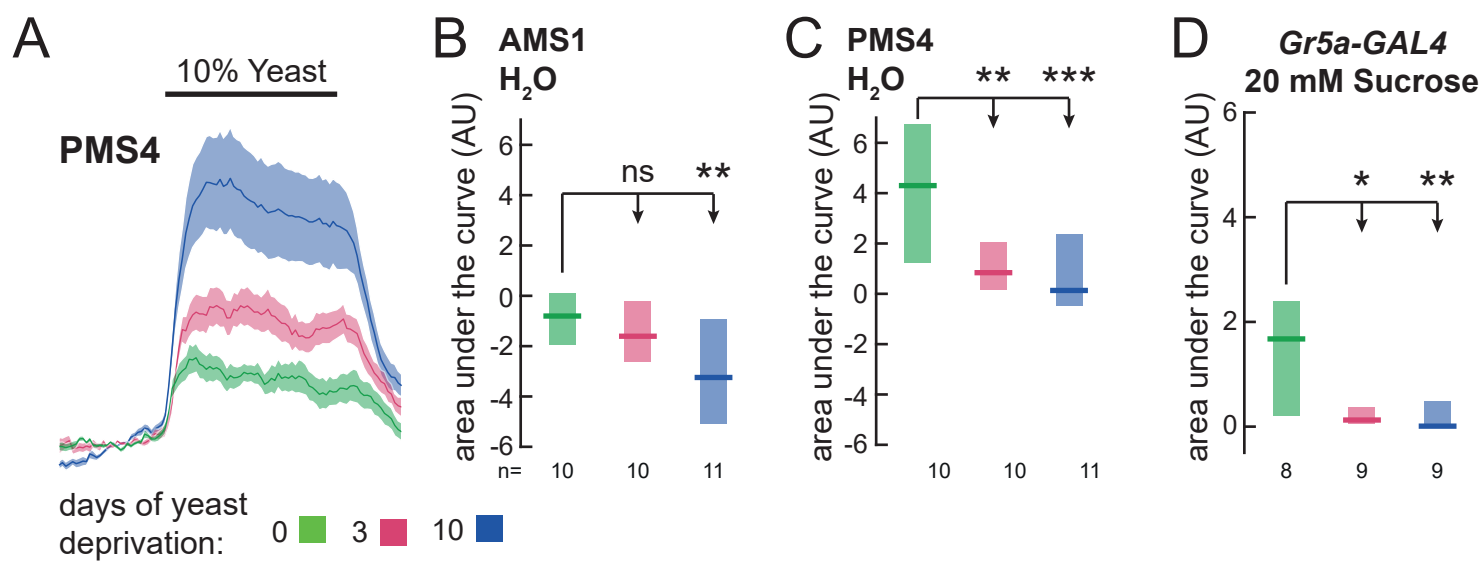

Steck et al -  
Figure 5  
Suppl 1

Supplement: supp [file elife-31625-supp-v1.zip]

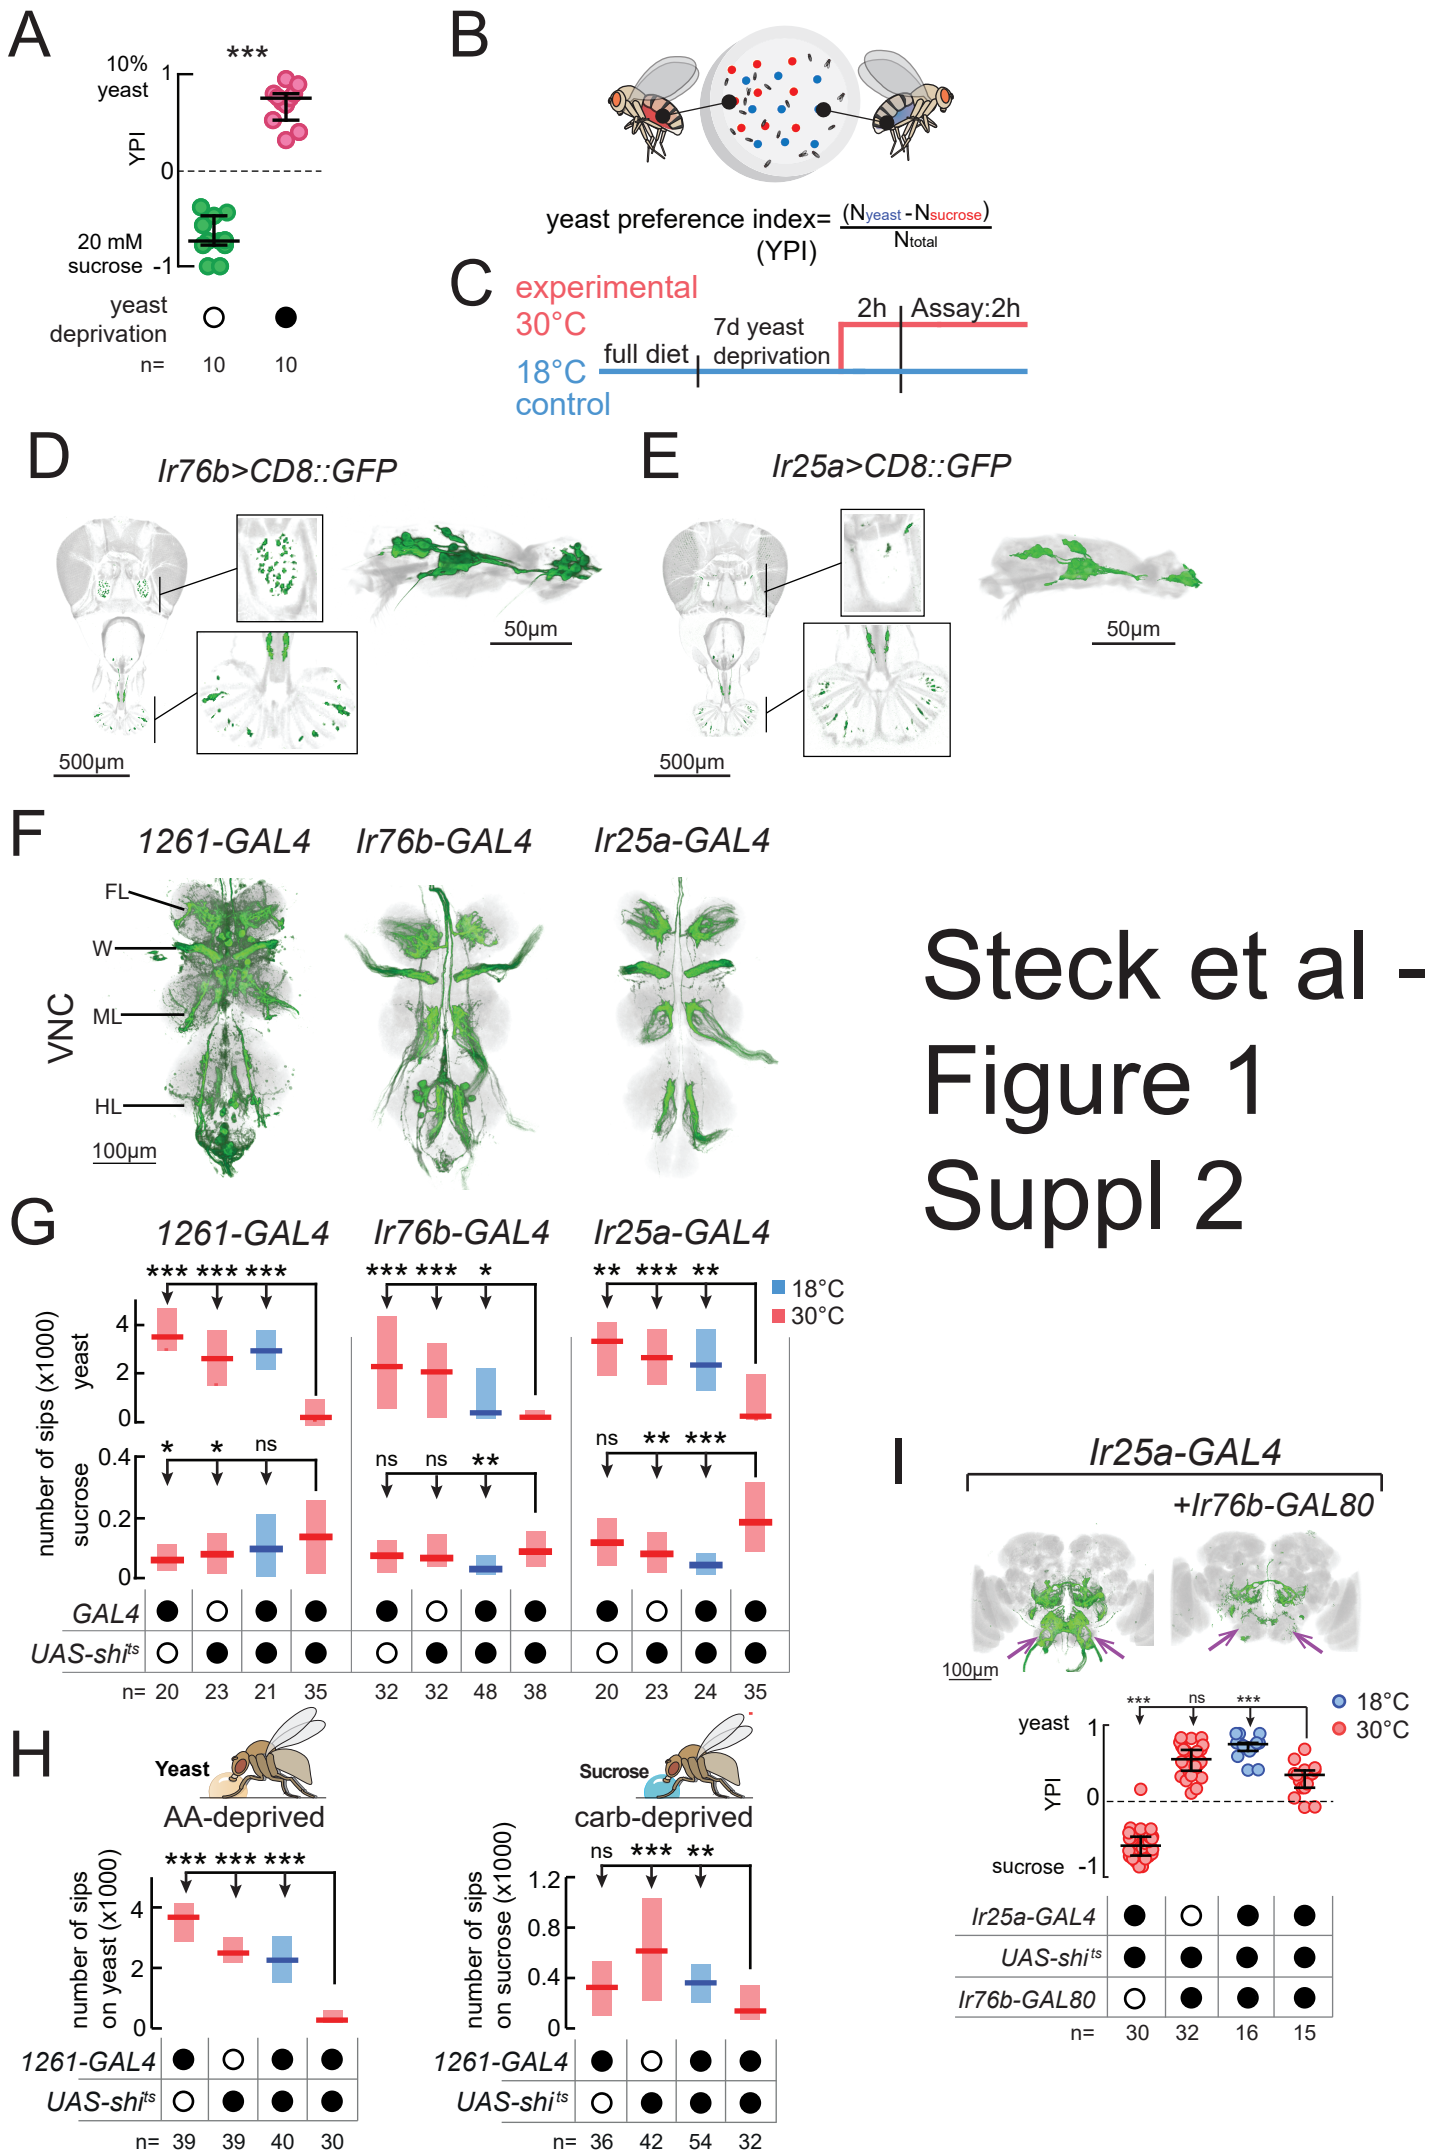

# Steck et al - Figure 1 Suppl 2

Supplement: supp [file elife-31625-supp-v1.zip]

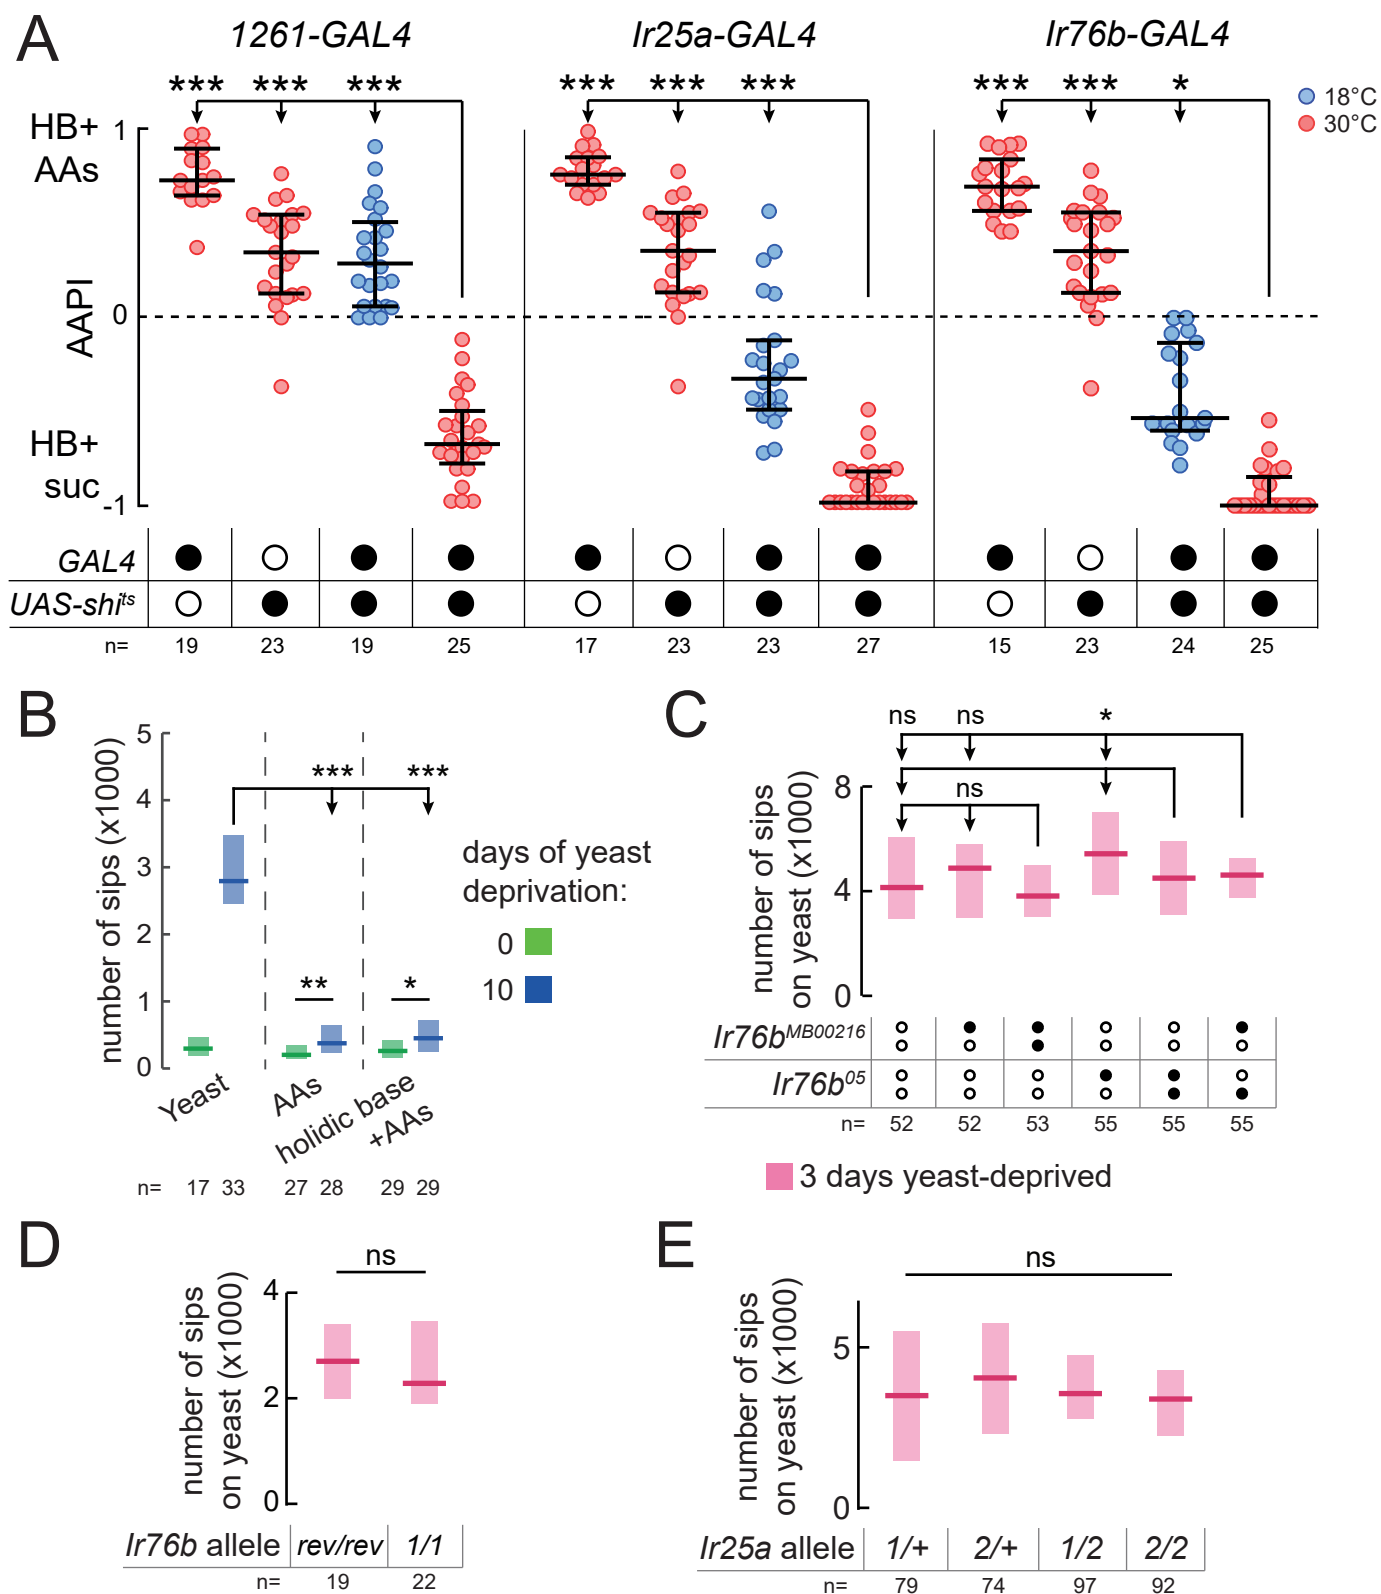

Steck et al -  
Figure 1  
Suppl 3

Supplement: supp [file elife-31625-supp-v1.zip]

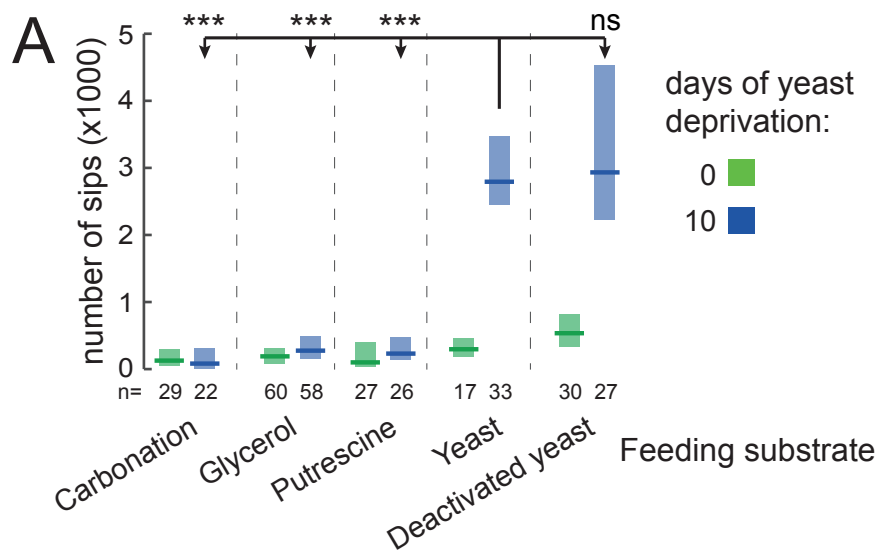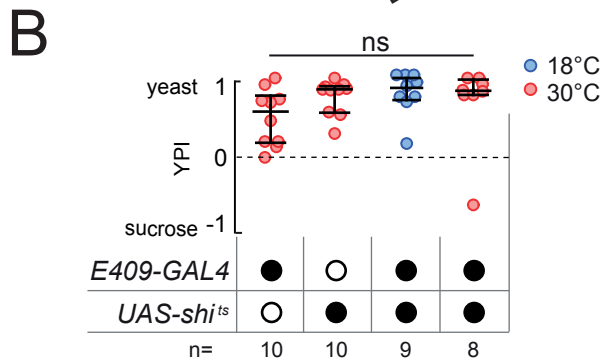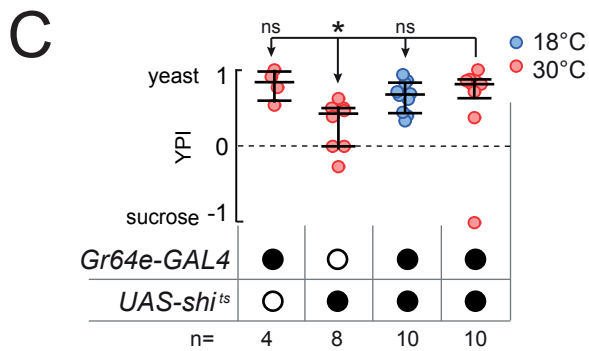

Steck et al -  
Figure 1  
Suppl 1

Supplement: supp [file elife-31625-supp-v1.zip]

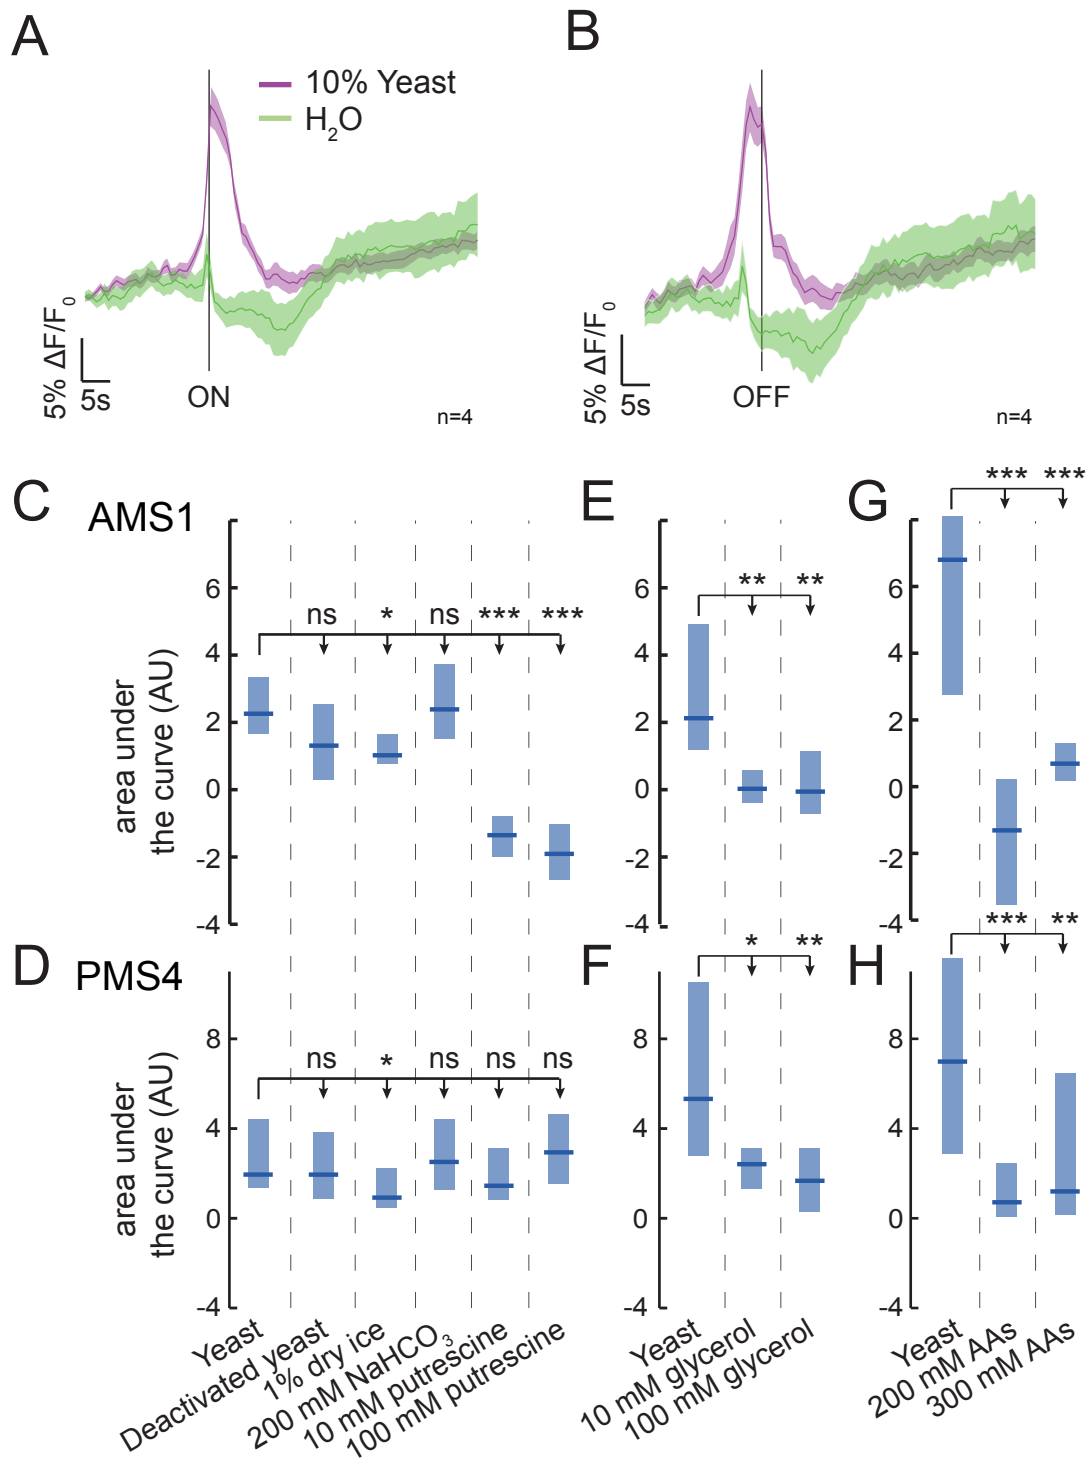

Steck et al -  
Figure 4  
Suppl 1

Supplement: supp [file elife-31625-supp-v1.zip]

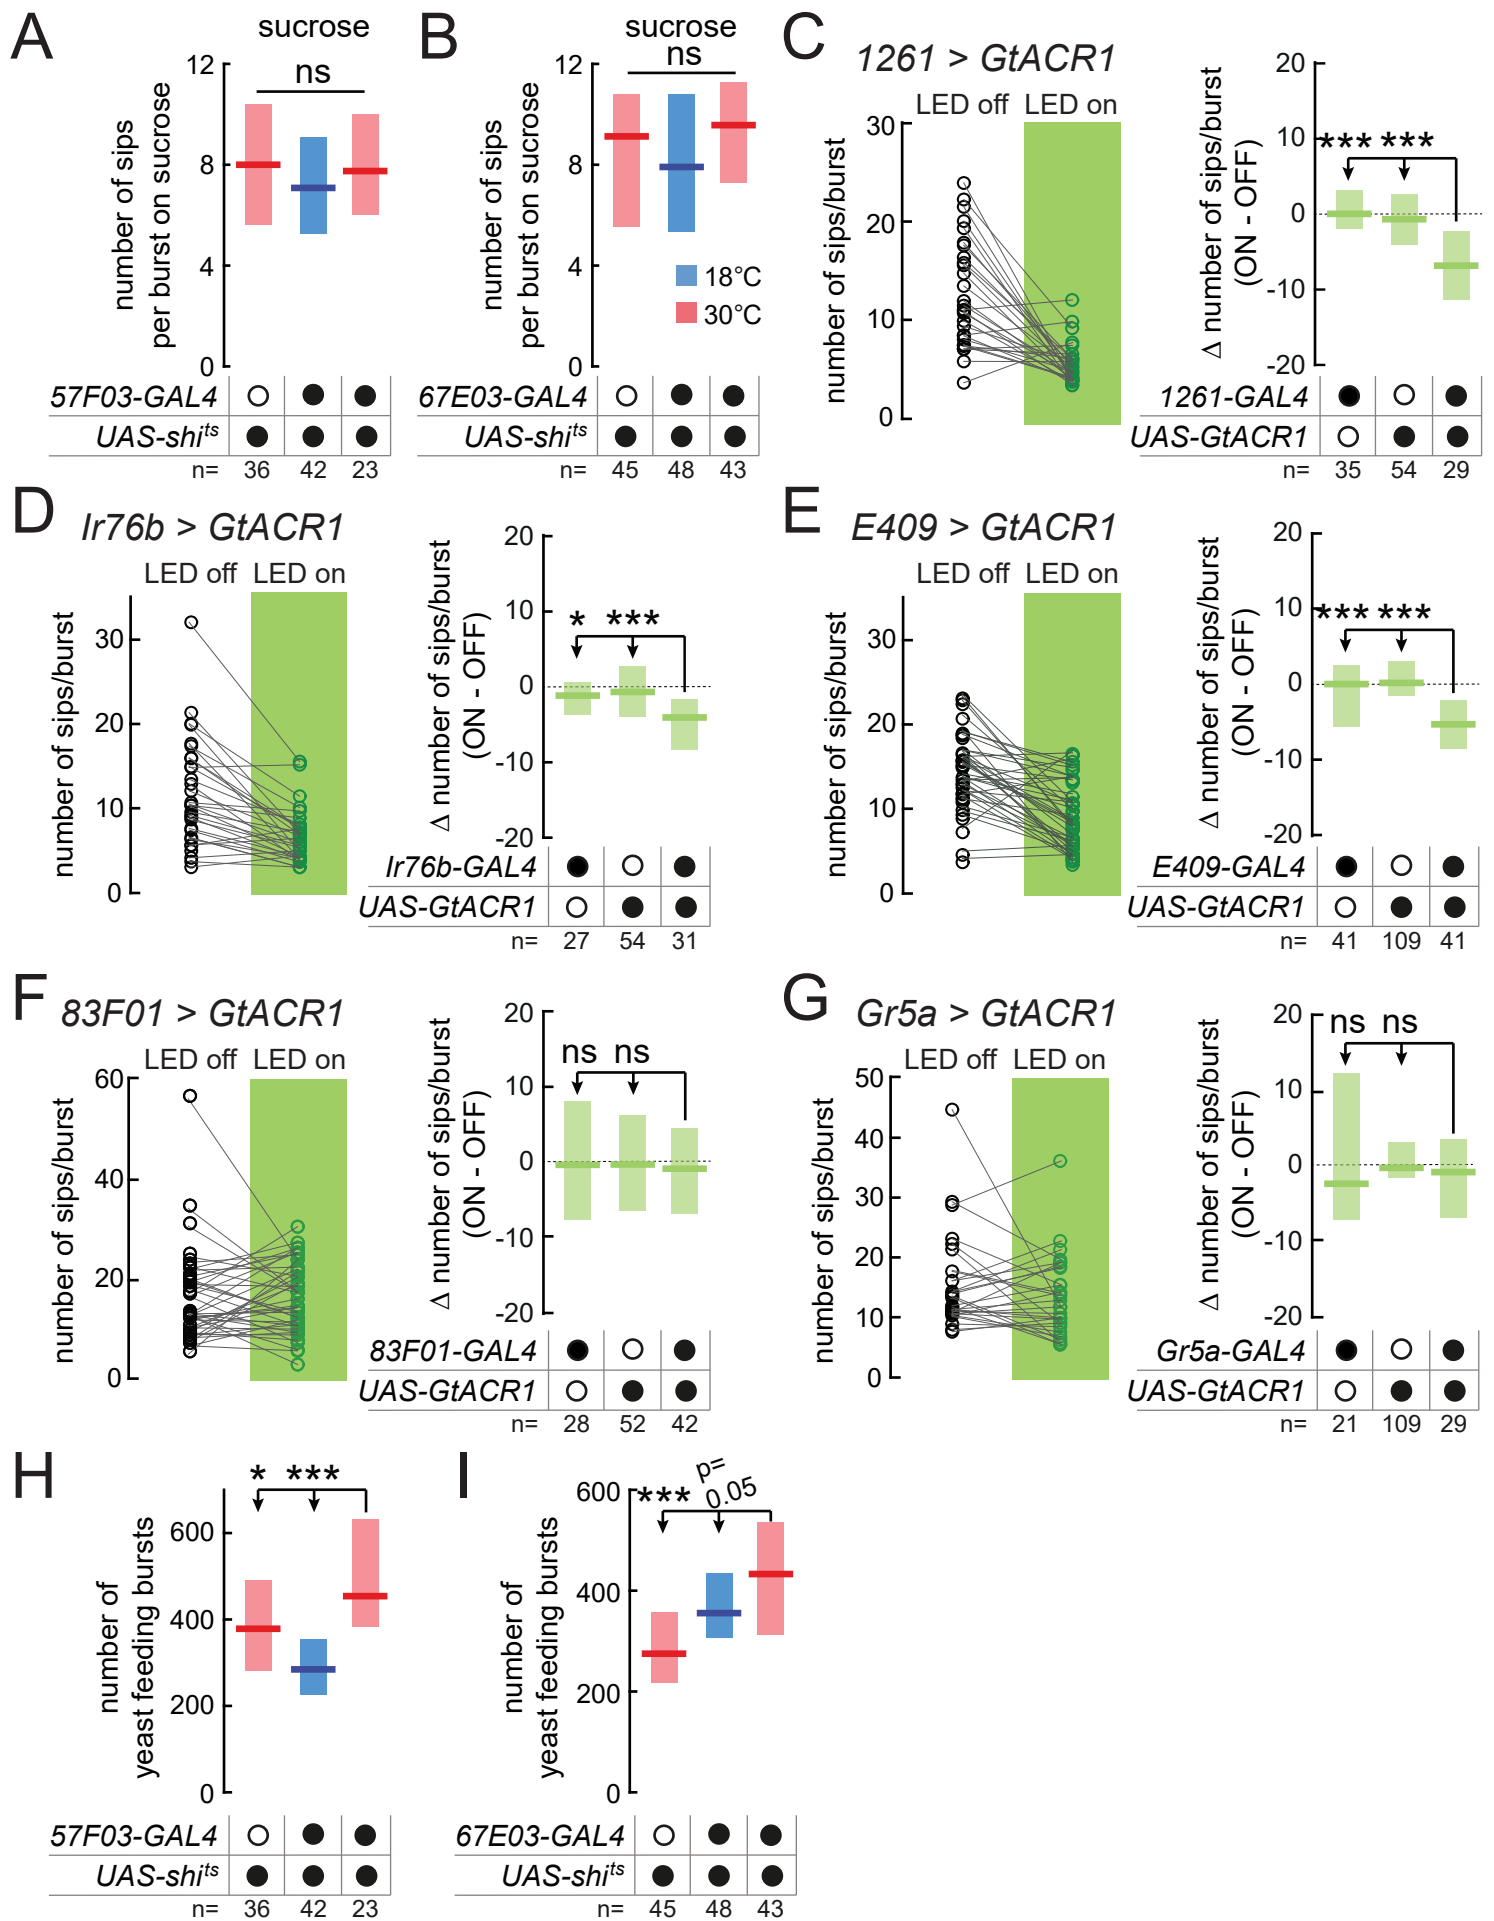

Steck et al - Figure 3 suppl 1

Supplement: supp [file elife-31625-supp-v1.zip]

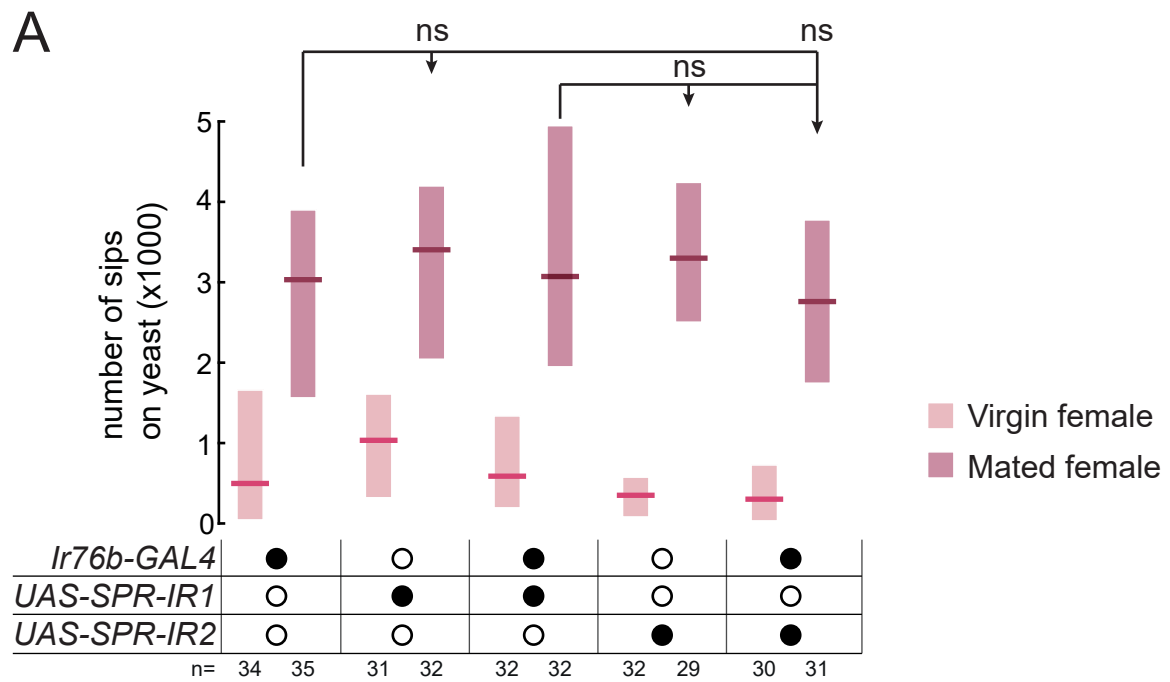

Steck et al -  
Figure 6  
Suppl 1

Supplement: supp [file elife-31625-supp-v1.zip]

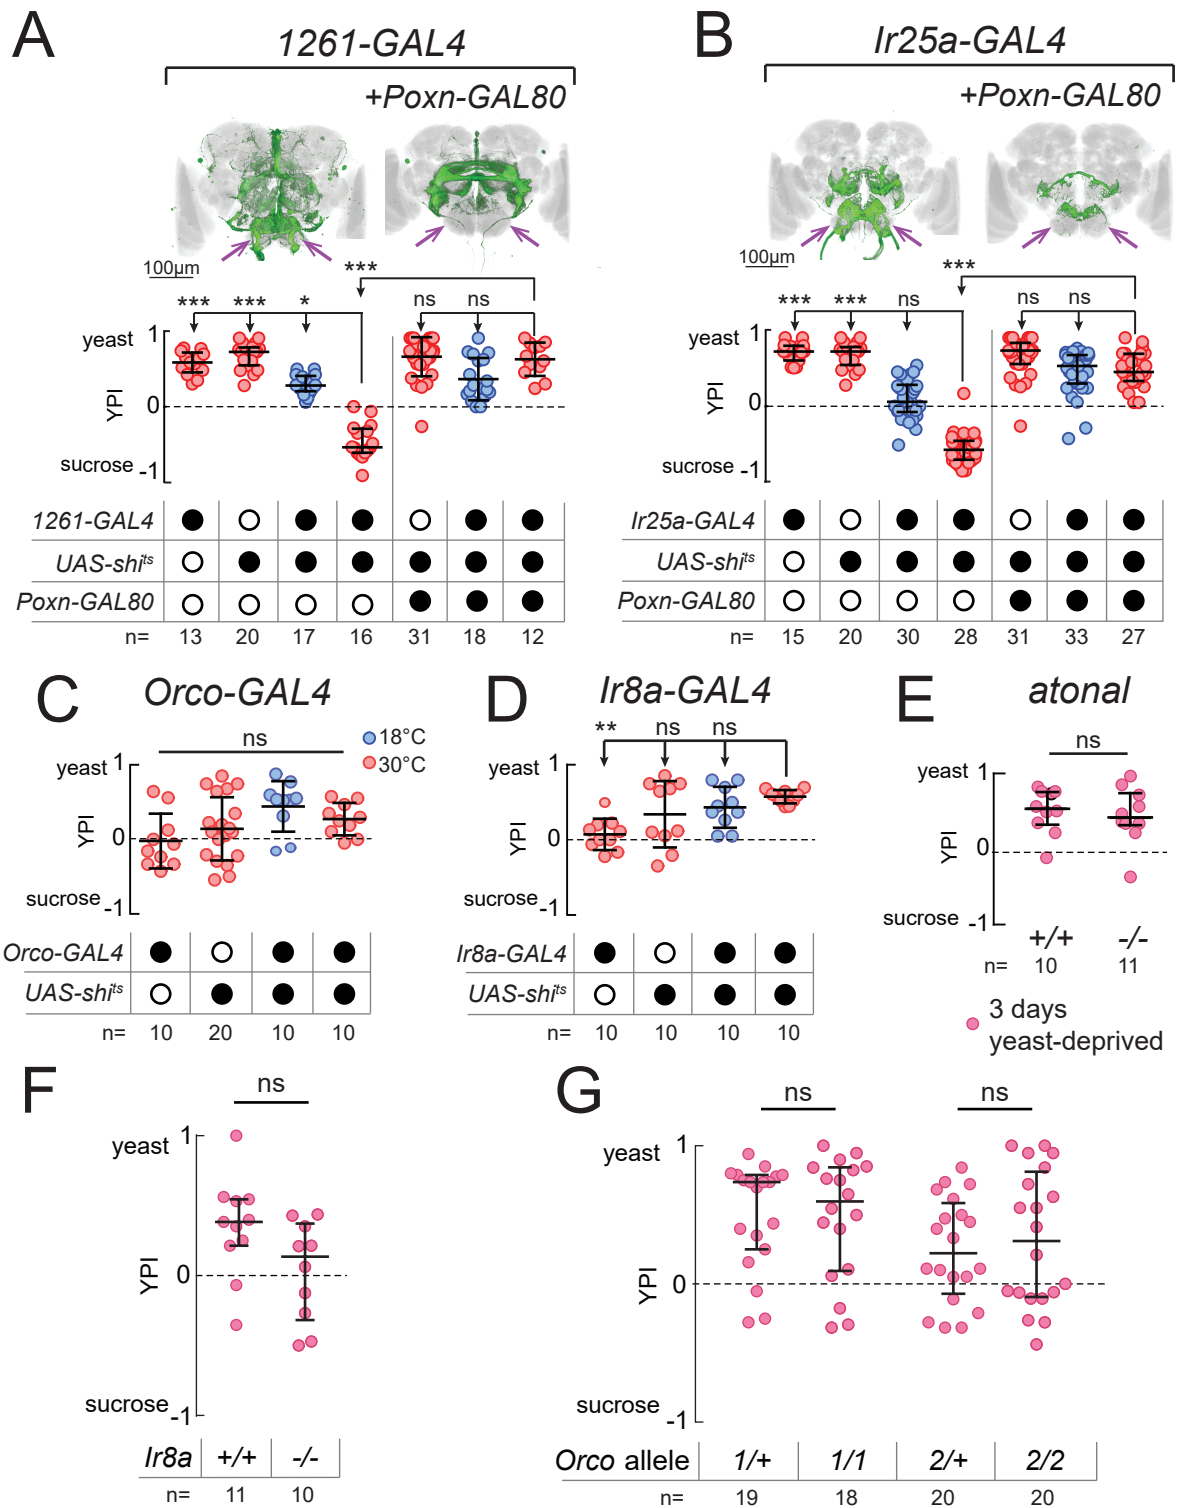

Steck et al -  
Figure 2  
Suppl 1

Supplement: supp [file elife-31625-supp-v1.zip]

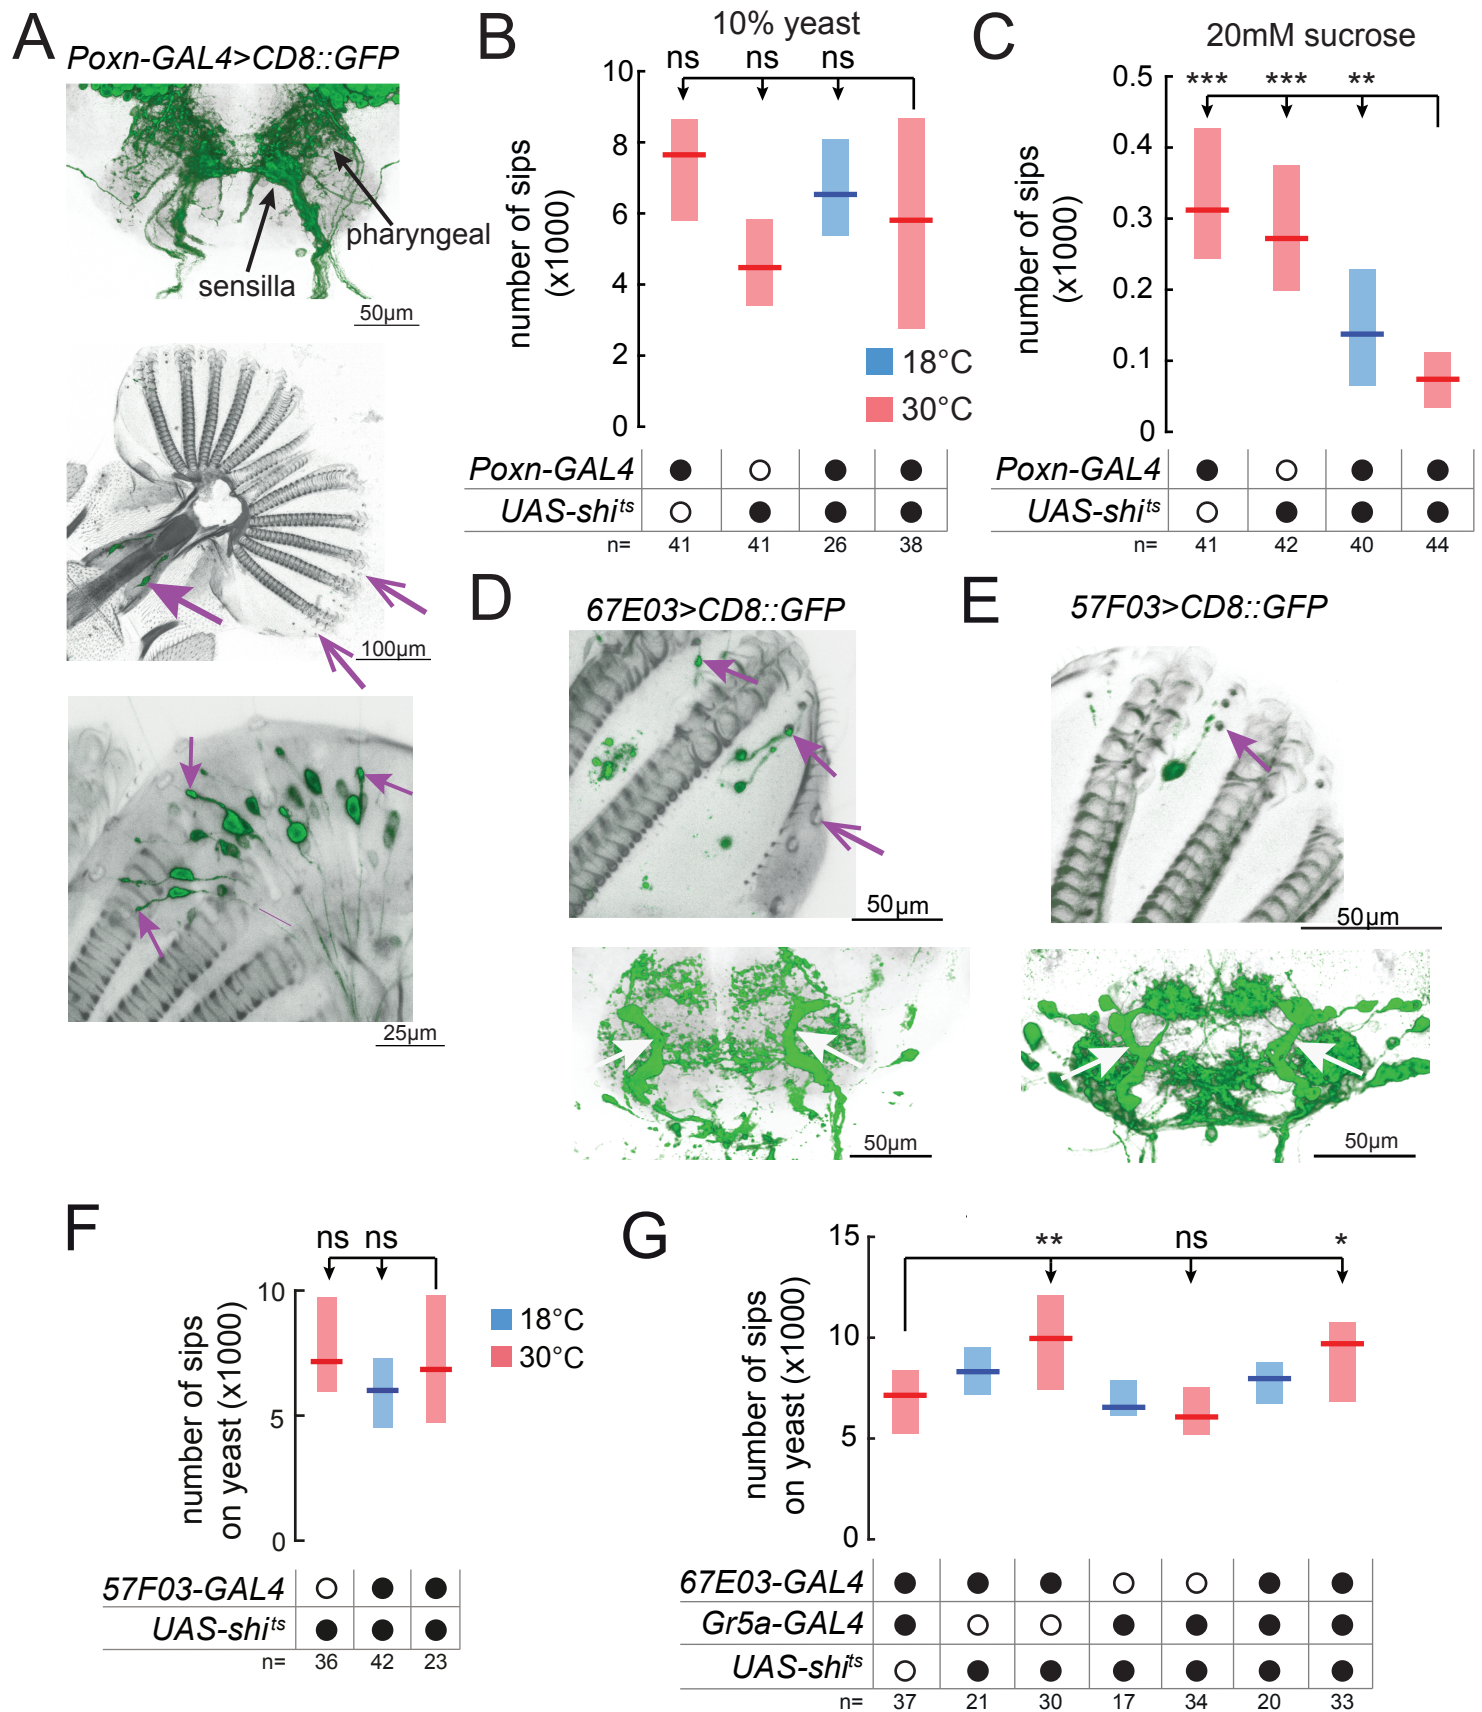

Steck et al - Figure 2 Suppl 2

Supplement: supp [file elife-31625-supp-v1.zip]

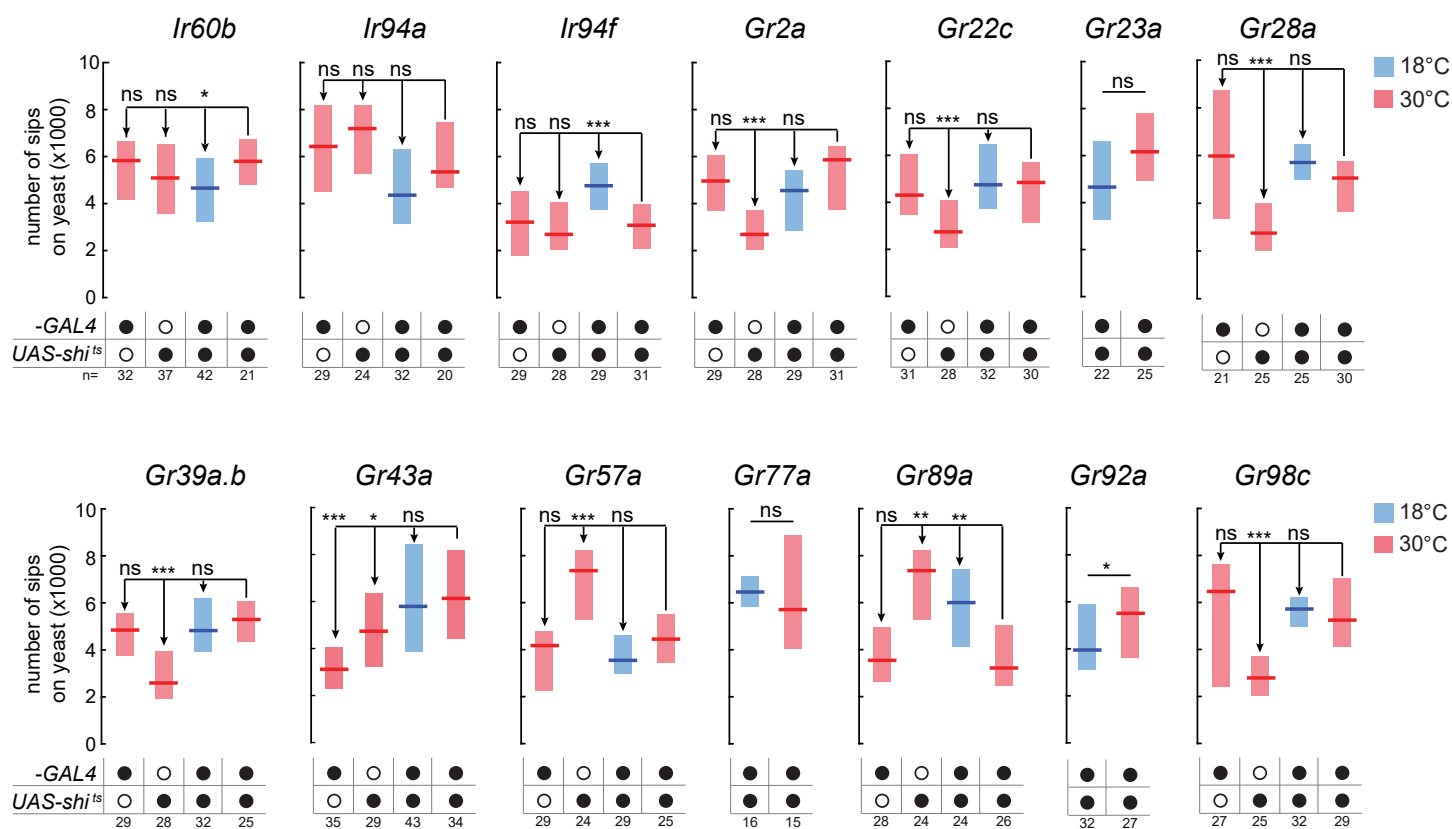

Steck et al -  
Figure 2  
Suppl 3

Supplement: supp [file elife-31625-supp-v1.zip]
